# Supplementary material for: STARD1 and NPC1 expression as pathological markers associated with astrogliosis in post-mortem brains from patients with Alzheimer's disease and Down syndrome
Source: publisher site journal article supplement (doi:10.18632/aging.102641), 2020-01-05
Supplement: Supplementary file [file aging-v12i1-102641-supplementary-material-SD3.pdf]

## SUPPLEMENTARY TABLES

**Supplementary Table 1. Overview of modulation of key proteins involved in intracellular cholesterol trafficking in the brain (1).**

| Control                                  |                                        |                                                                   |                                             |                                        |                                        |                      |                                                                   |                                        |
|------------------------------------------|----------------------------------------|-------------------------------------------------------------------|---------------------------------------------|----------------------------------------|----------------------------------------|----------------------|-------------------------------------------------------------------|----------------------------------------|
| Cortical levels (n-fold) <i>mean±SEM</i> |                                        |                                                                   | Hippocampal levels (n-fold) <i>mean±SEM</i> |                                        |                                        |                      |                                                                   |                                        |
| Marker                                   | mRNA                                   | Protein <sup>(a)</sup>                                            | CA1                                         |                                        | CA2                                    |                      | CA3                                                               |                                        |
|                                          |                                        |                                                                   | Protein <sup>(b)</sup>                      | GFAP+ colocalization                   | Protein <sup>(b)</sup>                 | GFAP+ colocalization | Protein <sup>(b)</sup>                                            | GFAP+ colocalization                   |
| Aβ42                                     | n.a.                                   | n.a.                                                              | 1.00 ± 0.262                                | n.a.                                   | 1.00 ± 0.471                           | n.a.                 | 1.00 ± 0.323                                                      | n.a.                                   |
| p-tau                                    | n.a.                                   | n.a.                                                              | 1.00 ± 0.342                                | n.a.                                   | 1.00 ± 0.368                           | n.a.                 | 1.00 ± 0.288                                                      | n.a.                                   |
| NPC1                                     | 1.00 ± 0.019                           | 1.00 ± 0.017                                                      | 1.00 ± 0.173                                | 1.00 ± 0.196                           | 1.00 ± 0.357                           | 1.00 ± 0.120         | 1.00 ± 0.331                                                      | 1.00 ± 0.192                           |
| StARDI                                   | 1.00 ± 0.015                           | 1.00 ± 0.044                                                      | 1.00 ± 0.321                                | 1.00 ± 0.271                           | 1.00 ± 0.458                           | 1.00 ± 0.331         | 1.00 ± 0.396                                                      | 1.00 ± 0.178                           |
| StARD3/<br>MLN64                         | 1.00 ± 0.030                           | 1.00 ± 0.237                                                      | n.a.                                        | n.a.                                   | n.a.                                   | n.a.                 | n.a.                                                              | n.a.                                   |
| StARD4                                   | 1.00 ± 0.023                           | n.a.                                                              | n.a.                                        | n.a.                                   | n.a.                                   | n.a.                 | n.a.                                                              | n.a.                                   |
| INSIG                                    | n.a.                                   | 1.00 ± 0.053                                                      | n.a.                                        | n.a.                                   | n.a.                                   | n.a.                 | n.a.                                                              | n.a.                                   |
| SREBP2                                   | n.a.                                   | 1.00 ± 0.028                                                      | n.a.                                        | n.a.                                   | n.a.                                   | n.a.                 | n.a.                                                              | n.a.                                   |
| Alzheimer disease                        |                                        |                                                                   |                                             |                                        |                                        |                      |                                                                   |                                        |
| Cortical levels (n-fold) <i>mean±SEM</i> |                                        |                                                                   | Hippocampal levels (n-fold) <i>mean±SEM</i> |                                        |                                        |                      |                                                                   |                                        |
| Marker                                   | mRNA                                   | Protein <sup>(a)</sup>                                            | CA1                                         |                                        | CA2                                    |                      | CA3                                                               |                                        |
|                                          |                                        |                                                                   | Protein <sup>(b)</sup>                      | GFAP+ colocalization                   | Protein <sup>(b)</sup>                 | GFAP+ colocalization | Protein <sup>(b)</sup>                                            | GFAP+ colocalization                   |
| Aβ42                                     | n.a.                                   | n.a.                                                              | 7.04 ± 2.106                                | n.a.                                   | 1.97 ± 0.727                           | n.a.                 | 1.91 ± 0.556                                                      | n.a.                                   |
| p-tau                                    | n.a.                                   | n.a.                                                              | 2.42 ± 0.736                                | n.a.                                   | 1.63 ± 0.554                           | n.a.                 | 1.67 ± 0.621                                                      | n.a.                                   |
| NPC1                                     | 1.02 ± 0.039                           | 1.12 ± 0.025<br>p <sub>1</sub> =0.0043                            | 8.07 ± 1.834<br>p <sub>1</sub> =0.0006      | 0.92 ± 0.194                           | 3.77 ± 0.800<br>p <sub>1</sub> =0.0111 | 1.25 ± 0.238         | 8.06 ± 1.539<br>p <sub>1</sub> =0.0006                            | 1.08 ± 0.087<br>p <sub>2</sub> =0.0023 |
| StARDI                                   | 1.00 ± 0.014                           | 1.25 ± 0.056<br>P <sub>1</sub> =0.0087                            | 2.31 ± 0.419<br>p <sub>1</sub> =0.0379      | 2.60 ± 0.563<br>P <sub>1</sub> =0.0111 | 2.00 ± 0.918                           | 0.67 ± 0.232         | 5.92 ± 2.171<br>P <sub>1</sub> =0.0047;<br>p <sub>2</sub> =0.0130 | 1.19 ± 0.249                           |
| StARD3/ML<br>N64                         | 0.99 ± 0.062                           | 0.64 ± 0.150                                                      | n.a.                                        | n.a.                                   | n.a.                                   | n.a.                 | n.a.                                                              | n.a.                                   |
| StARD4                                   | 1.00 ± 0.020                           | n.a.                                                              | n.a.                                        | n.a.                                   | n.a.                                   | n.a.                 | n.a.                                                              | n.a.                                   |
| INSIG                                    | n.a.                                   | 1.05 ± 0.160                                                      | n.a.                                        | n.a.                                   | n.a.                                   | n.a.                 | n.a.                                                              | n.a.                                   |
| SREBP2                                   | n.a.                                   | 1.12 ± 0.161                                                      | n.a.                                        | n.a.                                   | n.a.                                   | n.a.                 | n.a.                                                              | n.a.                                   |
| Down syndrome                            |                                        |                                                                   |                                             |                                        |                                        |                      |                                                                   |                                        |
| Cortical levels (n-fold) <i>mean±SEM</i> |                                        |                                                                   | Hippocampal levels (n-fold) <i>mean±SEM</i> |                                        |                                        |                      |                                                                   |                                        |
| Marker                                   | mRNA                                   | Protein <sup>(a)</sup>                                            | CA1                                         |                                        | CA2                                    |                      | CA3                                                               |                                        |
|                                          |                                        |                                                                   | Protein <sup>(b)</sup>                      | GFAP+ colocalization                   | Protein <sup>(b)</sup>                 | GFAP+ colocalization | Protein <sup>(b)</sup>                                            | GFAP+ colocalization                   |
| A(342)                                   | n.a.                                   | n.a.                                                              | 11.30 ± 3.423<br>P <sub>i</sub> =0.0012     | n.a.                                   | 4.27 ± 1.275<br>P <sub>i</sub> =0.0177 | n.a.                 | 3.99 ± 1.051<br>P <sub>i</sub> =0.0221                            | n.a.                                   |
| p-tau                                    | n.a.                                   | n.a.                                                              | 2.59 ± 0.783                                | n.a.                                   | 2.29 ± 0.784                           | n.a.                 | 2.88 ± 1.135                                                      | n.a.                                   |
| IMPCI                                    | 1.08 ± 0.028                           | 1.04 ± 0.036                                                      | 9.86 ± 2.413<br>p <sub>1</sub> =0.0006      | 1.62 ± 0.420                           | 5.41 ± 1.740<br>P <sub>1</sub> =0.0111 | 2.05 ± 0.577         | 8.79 ± 1.822<br>P <sub>1</sub> =0.0006                            | 1.08 ± 0.087<br>p <sub>1</sub> =0.0023 |
| StARDI                                   | 1.08 ± 0.013<br>P <sub>1</sub> =0.0087 | 1.35 ± 0.044<br>P <sub>1</sub> =0.0043;<br>p <sub>2</sub> =0.0159 | 0.97 ± 0.182<br>p <sub>2</sub> =0.0111      | 2.81 ± 0.755                           | 0.56 ± 0.212                           | 0.80 ± 0.246         | 2.62 ± 1.290<br>p <sub>2</sub> =0.0130                            | 2.01 ± 0.311<br>P <sub>1</sub> =0.0111 |

|                  |              |              |      |      |      |      |      |      |
|------------------|--------------|--------------|------|------|------|------|------|------|
| StARD3/<br>MLN64 | 1.13 ± 0.053 | 1.47 ± 0.277 | n.a. | n.a. | n.a. | n.a. | n.a. | n.a. |
| StARD4           | 1.03 ± 0.008 | n.a.         | n.a. | n.a. | n.a. | n.a. | n.a. | n.a. |
| INSIG            | n.a.         | 1.14 ± 0.043 | n.a. | n.a. | n.a. | n.a. | n.a. | n.a. |
| SREBP2           | n.a.         | 1.14 ± 0.061 | n.a. | n.a. | n.a. | n.a. | n.a. | n.a. |

NOTE: P values are calculated by differences against control (pi) or differences between AD and DS (pz).

### Supplementary Table 2. Overview of modulation of key proteins involved in intracellular cholesterol trafficking in the brain (1).

| <i>Astrocyte (GFAP+) cholesterol (PFO+) colocalization (n-fold)</i> |                |                            |                                 |
|---------------------------------------------------------------------|----------------|----------------------------|---------------------------------|
| <i>Organelle marker</i>                                             | <i>Control</i> | <i>AD</i>                  | <i>DS</i>                       |
| <i>Tom20 (mitochondria)</i>                                         | 1.00 ± 0.257   | 2.55 ± 0.297; $p_1=0.0079$ | 2.77 ± 0.203; $p_1=0.0159$      |
| <i>Lamp1 (lysosome)</i>                                             | 1.00 ± 0.136   | 3.43 ± 0.502; $p_1=0.0079$ | 14.41 ± 1.322; $p_{1,2}=0.0079$ |

### Supplementary Table 3. Oligonucleotides used for gene expression analysis by RT-qPCR.

| <b>Gene</b> | <b>Sequence</b>         |
|-------------|-------------------------|
| StARD1      | 5'-GAGGAGGCCATGCAGAA    |
|             | 5'-GAACACCTTGCCCACATC   |
| StARD3      | 5'-AGTGAGGAGCCCAGGGAG   |
|             | 5'-CCGTGGCTGACATGGAG    |
| StARD4      | 5'-CGTTTTCTTAGCAACTCGCC |
|             | 5'-CTTCCACGTCCTTGCTTCAC |
| NPC1        | 5'-CATCCTTTGGCAATGGTTTT |
|             | 5'-CTGCTGCTACTGTGTCCAGC |
| β-Actin     | 5'-TTGCCGACAGGATGCAGAA  |
|             | 5'-GCCGATCCACACGGAGTACT |

**Supplementary Table 4. Primary antibodies used in this study.**

| <b>Antibody</b>                 | <b>Source and type</b> | <b>Company</b>        | <b>WB dilution</b> | <b>IHC/IF dilution</b> |
|---------------------------------|------------------------|-----------------------|--------------------|------------------------|
| StARD1                          | Rabbit monoclonal      | Abcam (ab133657)      | 1:1000             | 1:200                  |
| StARD3 (MLN64)                  | Rabbit polyclonal      | Sant Cruz (sc-292868) | 1:1000             |                        |
| SREBP2                          | Rabbit polyclonal      | Abcam (ab28482)       | 1:500              |                        |
| INSIG-1                         | Rabbit polyclonal      | Abcam (ab70784)       | 1:1000             |                        |
| NPC-1                           | Rabbit polyclonal      | Abcam (ab36983)       | 1:500              | 1:200                  |
| A $\beta$ human (6F/3D)         | Mouse monoclonal       | Dako (M0872)          |                    | 1:2000                 |
| Lamp1                           | Rabbit polyclonal      | Sant Cruz (sc-5570)   |                    | 1:200                  |
| Tom20                           | Rabbit polyclonal      | Sant Cruz (sc-11415)  |                    | 1:200                  |
| GFAP                            | Rat monoclonal         | Calbiochem (345860)   |                    | 1:200                  |
| Glutathione-S-Transferase (GST) | Mouse monoclonal       | Sant Cruz (sc-374171) |                    | 1:200                  |
| PHF-tau (AT8)                   | Mouse monoclonal       | Thermofisher (MN1020) |                    | 1:200                  |
| $\beta$ -Actin-HRP              | Mouse monoclonal       | Sigma (A3854)         | 1:20000            |                        |
| NeuN                            | Mouse monoclonal       | Millipore (MAB377)    |                    | 1:200                  |
| IBA1                            | Mouse monoclonal       | Santa Cruz (sc-32725) |                    | 1:200                  |
